# Supplementary material for: Two-dimensional metal–organic frameworks as bifunctional electrocatalysts for the oxygen evolution reaction and oxygen reduction reaction (OER/ORR): a theoretical study
Source: Royal Society of Chemistry journal article supplement (doi:10.1039/d3cp01193c), 2023-01-01
Supplement: d3cp01193c1.pdf [file d3cp01193c1.pdf]

## Supporting Information

*Feifei Xu<sup>a</sup>, Zhixiao Gao, Zhencui Ge<sup>b</sup>, Hao Ma, Hao Ren, Houyu Zhu, Yuhua Chi, Wenyue Guo\*, Wen Zhao\**

*<sup>a</sup> School of Materials Science and Engineering, China University of Petroleum (East China), Qingdao 266580, Shandong, China*

*<sup>b</sup> School of Science, China University of Petroleum (East China), Qingdao, Shandong 266580, PR China*

\* Corresponding author.

E-mail addresses:

wyguo@upc.edu.cn (Wenyue Guo)

zhaowen@upc.edu.cn (Wen Zhao)

**Table S1.** Formation energies ( $E_{\text{form}}$ ) of  $M_3(C_6Se_6)_2$ , the number of transferred electrons ( $N_e$ ) during the process of dissolution, the standard dissolution potentials ( $U_{\text{diss-bulk}}$ ) of M bulk, and the calculated dissolution potentials ( $U_{\text{diss}}$ ) of M atoms on  $M_3(C_6Se_6)_2$ .

| $M_3(C_6Se_6)_2$ | $E_{\text{form}}$ (eV) | $N_e$ | $U_{\text{diss-bulk}}$ | $U_{\text{diss}}$ |
|------------------|------------------------|-------|------------------------|-------------------|
| Ti               | -4.14                  | 2     | -1.63                  | 0.44              |
| V                | -1.18                  | 2     | -1.18                  | -0.59             |
| Cr               | -1.09                  | 2     | -0.91                  | -0.37             |
| Mn               | -2.61                  | 2     | -1.19                  | 0.12              |
| Fe               | -1.43                  | 2     | -0.45                  | 0.26              |
| Co               | -1.63                  | 2     | -0.28                  | 0.53              |
| Ni               | -2.44                  | 2     | -0.26                  | 0.96              |
| Cu               | -1.62                  | 2     | 0.34                   | 1.15              |
| Zr               | -4.69                  | 4     | -1.45                  | -0.28             |
| Nb               | -0.87                  | 3     | -1.1                   | -0.81             |
| Mo               | 1.88                   | 3     | -0.2                   | -0.83             |
| Ru               | -0.44                  | 2     | 0.46                   | 0.68              |
| Rh               | -1.59                  | 2     | 0.6                    | 1.39              |
| Pd               | -2.82                  | 2     | 0.95                   | 2.36              |
| Ir               | -1.32                  | 3     | 1.16                   | 1.6               |
| Pt               | -3.52                  | 2     | 1.18                   | 2.94              |

**Table S2.** Optimized lattice constants, magnetic moments, and pore sizes ( $D_p$ ) of the  $M_3(C_6Se_6)_2$  systems.

| $M_3(C_6Se_6)_2$  | Lattice constant<br>(Å) | magnetic moments of<br>the MOFs ( $\mu_B$ ) | $D_p$<br>(Å) |
|-------------------|-------------------------|---------------------------------------------|--------------|
| $Mn_3(C_6Se_6)_2$ | 15.69                   | 9.0000                                      | 15.69        |
| $Fe_3(C_6Se_6)_2$ | 15.52                   | 6.1504                                      | 15.52        |
| $Co_3(C_6Se_6)_2$ | 15.41                   | 3.0007                                      | 15.41        |
| $Ni_3(C_6Se_6)_2$ | 15.37                   | 0.0000                                      | 15.37        |
| $Cu_3(C_6Se_6)_2$ | 15.42                   | 0.0000                                      | 15.42        |
| $Ru_3(C_6Se_6)_2$ | 15.90                   | 5.9992                                      | 15.90        |
| $Rh_3(C_6Se_6)_2$ | 15.77                   | 2.8837                                      | 15.77        |
| $Pd_3(C_6Se_6)_2$ | 15.76                   | 0.0000                                      | 15.76        |
| $Ir_3(C_6Se_6)_2$ | 15.78                   | 2.9270                                      | 15.78        |
| $Pt_3(C_6Se_6)_2$ | 15.78                   | 0.0000                                      | 15.78        |

**Table S3.** Calculated zero-point energies and Gibbs free energies of OH\* on  $M_3(C_6Se_6)_2$ .

| $M_3(C_6Se_6)_2$  | $E_{ZPE}$ (eV) | $T\Delta S$ | $G$ (eV) |
|-------------------|----------------|-------------|----------|
| $Mn_3(C_6Se_6)_2$ | 0.33           | 0.08        | -202.55  |
| $Fe_3(C_6Se_6)_2$ | 0.34           | 0.11        | -199.55  |
| $Co_3(C_6Se_6)_2$ | 0.35           | 0.10        | -195.46  |
| $Ni_3(C_6Se_6)_2$ | 0.32           | 0.10        | -190.98  |
| $Cu_3(C_6Se_6)_2$ | 0.31           | 0.17        | -183.85  |
| $Ru_3(C_6Se_6)_2$ | 0.36           | 0.09        | -200.60  |
| $Rh_3(C_6Se_6)_2$ | 0.36           | 0.10        | -196.10  |
| $Pd_3(C_6Se_6)_2$ | 0.32           | 0.11        | -190.10  |
| $Ir_3(C_6Se_6)_2$ | 0.37           | 0.09        | -200.82  |
| $Pt_3(C_6Se_6)_2$ | 0.33           | 0.15        | -194.09  |

**Table S4.** Calculated zero-point energies and Gibbs free energies of O\* on  $M_3(C_6Se_6)_2$ .

| $M_3(C_6Se_6)_2$  | $E_{ZPE}$ (eV) | $T\Delta S$ | $G$ (eV) |
|-------------------|----------------|-------------|----------|
| $Mn_3(C_6Se_6)_2$ | 0.08           | 0.05        | -202.70  |
| $Fe_3(C_6Se_6)_2$ | 0.08           | 0.05        | -198.65  |
| $Co_3(C_6Se_6)_2$ | 0.06           | 0.08        | -194.30  |
| $Ni_3(C_6Se_6)_2$ | 0.08           | 0.04        | -190.47  |
| $Cu_3(C_6Se_6)_2$ | 0.02           | 0.02        | -181.49  |
| $Ru_3(C_6Se_6)_2$ | 0.08           | 0.05        | -200.38  |
| $Rh_3(C_6Se_6)_2$ | 0.06           | 0.07        | -194.92  |
| $Pd_3(C_6Se_6)_2$ | 0.05           | 0.10        | -188.05  |
| $Ir_3(C_6Se_6)_2$ | 0.07           | 0.07        | -199.94  |
| $Pt_3(C_6Se_6)_2$ | 0.05           | 0.09        | -192.30  |

**Table S5.** Calculated zero-point energies and Gibbs free energies of OOH\* on  $M_3(C_6Se_6)_2$ .

| $M_3(C_6Se_6)_2$  | $E_{ZPE}$ (eV) | $T\Delta S$ | $G$ (eV) |
|-------------------|----------------|-------------|----------|
| $Mn_3(C_6Se_6)_2$ | 0.42           | 0.23        | -199.89  |
| $Fe_3(C_6Se_6)_2$ | 0.43           | 0.20        | -195.99  |
| $Co_3(C_6Se_6)_2$ | 0.42           | 0.17        | -192.56  |
| $Ni_3(C_6Se_6)_2$ | 0.42           | 0.17        | -188.05  |
| $Cu_3(C_6Se_6)_2$ | 0.43           | 0.21        | -181.52  |
| $Ru_3(C_6Se_6)_2$ | 0.42           | 0.20        | -197.65  |
| $Rh_3(C_6Se_6)_2$ | 0.43           | 0.18        | -193.17  |
| $Pd_3(C_6Se_6)_2$ | 0.39           | 0.20        | -187.32  |
| $Ir_3(C_6Se_6)_2$ | 0.43           | 0.18        | -197.97  |
| $Pt_3(C_6Se_6)_2$ | 0.39           | 0.20        | -191.27  |

**Table S6.** The adsorption-free energies of OH\*, O\*, and OOH\* ( $\Delta G_{\text{OH}^*}$ ,  $\Delta G_{\text{O}^*}$ , and  $\Delta G_{\text{OOH}^*}$ ).

| $\text{M}_3(\text{C}_6\text{Se}_6)_2$  | $\Delta G_{\text{OH}^*}$ (eV) | $\Delta G_{\text{O}^*}$ (eV) | $\Delta G_{\text{OOH}^*}$ (eV) |
|----------------------------------------|-------------------------------|------------------------------|--------------------------------|
| $\text{Mn}_3(\text{C}_6\text{Se}_6)_2$ | 0.90                          | 0.74                         | 3.55                           |
| $\text{Fe}_3(\text{C}_6\text{Se}_6)_2$ | 0.62                          | 1.52                         | 4.18                           |
| $\text{Co}_3(\text{C}_6\text{Se}_6)_2$ | 1.09                          | 2.25                         | 3.99                           |
| $\text{Ni}_3(\text{C}_6\text{Se}_6)_2$ | 1.77                          | 2.27                         | 4.70                           |
| $\text{Cu}_3(\text{C}_6\text{Se}_6)_2$ | 2.02                          | 4.38                         | 4.35                           |
| $\text{Ru}_3(\text{C}_6\text{Se}_6)_2$ | -0.2                          | 0.01                         | 2.71                           |
| $\text{Rh}_3(\text{C}_6\text{Se}_6)_2$ | 0.94                          | 2.11                         | 3.87                           |
| $\text{Pd}_3(\text{C}_6\text{Se}_6)_2$ | 2.01                          | 4.06                         | 4.80                           |
| $\text{Ir}_3(\text{C}_6\text{Se}_6)_2$ | 0.91                          | 1.80                         | 3.77                           |
| $\text{Pt}_3(\text{C}_6\text{Se}_6)_2$ | 1.98                          | 3.77                         | 4.80                           |

**Table S7.** The free energy changes of each elementary step ( $\Delta G_1$ ,  $\Delta G_2$ ,  $\Delta G_3$ , and  $\Delta G_4$ ) and the overpotential of OER and ORR ( $\eta^{\text{OER}}$  and  $\eta^{\text{ORR}}$ ).

| $M_3(C_6Se_6)_2$                                               | $\Delta G_1$ (eV) | $\Delta G_2$ (eV) | $\Delta G_3$ (eV) | $\Delta G_4$ (eV) | $\eta^{\text{OER}}$ (V) | $\eta^{\text{ORR}}$ (V) |
|----------------------------------------------------------------|-------------------|-------------------|-------------------|-------------------|-------------------------|-------------------------|
| Mn <sub>3</sub> (C <sub>6</sub> Se <sub>6</sub> ) <sub>2</sub> | 1.37              | 2.81              | -0.15             | -0.90             | 1.58                    | 1.38                    |
| Fe <sub>3</sub> (C <sub>6</sub> Se <sub>6</sub> ) <sub>2</sub> | 0.74              | 2.66              | 0.90              | 0.62              | 1.43                    | 0.61                    |
| Co <sub>3</sub> (C <sub>6</sub> Se <sub>6</sub> ) <sub>2</sub> | 0.93              | 1.74              | 1.16              | 1.09              | 0.51                    | 0.30                    |
| Ni <sub>3</sub> (C <sub>6</sub> Se <sub>6</sub> ) <sub>2</sub> | 0.22              | 2.43              | 0.50              | 1.77              | 1.2                     | 1.01                    |
| Cu <sub>3</sub> (C <sub>6</sub> Se <sub>6</sub> ) <sub>2</sub> | 0.57              | -0.03             | 2.36              | 2.02              | 1.13                    | 1.26                    |
| Ru <sub>3</sub> (C <sub>6</sub> Se <sub>6</sub> ) <sub>2</sub> | 2.18              | 2.73              | 0.22              | -0.20             | 1.5                     | 1.43                    |
| Rh <sub>3</sub> (C <sub>6</sub> Se <sub>6</sub> ) <sub>2</sub> | 1.05              | 1.76              | 1.18              | 0.94              | 0.53                    | 0.29                    |
| Pd <sub>3</sub> (C <sub>6</sub> Se <sub>6</sub> ) <sub>2</sub> | 0.12              | 0.74              | 2.04              | 2.01              | 0.81                    | 1.11                    |
| Ir <sub>3</sub> (C <sub>6</sub> Se <sub>6</sub> ) <sub>2</sub> | 1.15              | 1.97              | 0.89              | 0.91              | 0.74                    | 0.34                    |
| Pt <sub>3</sub> (C <sub>6</sub> Se <sub>6</sub> ) <sub>2</sub> | 0.12              | 1.03              | 1.79              | 1.98              | 0.75                    | 1.11                    |



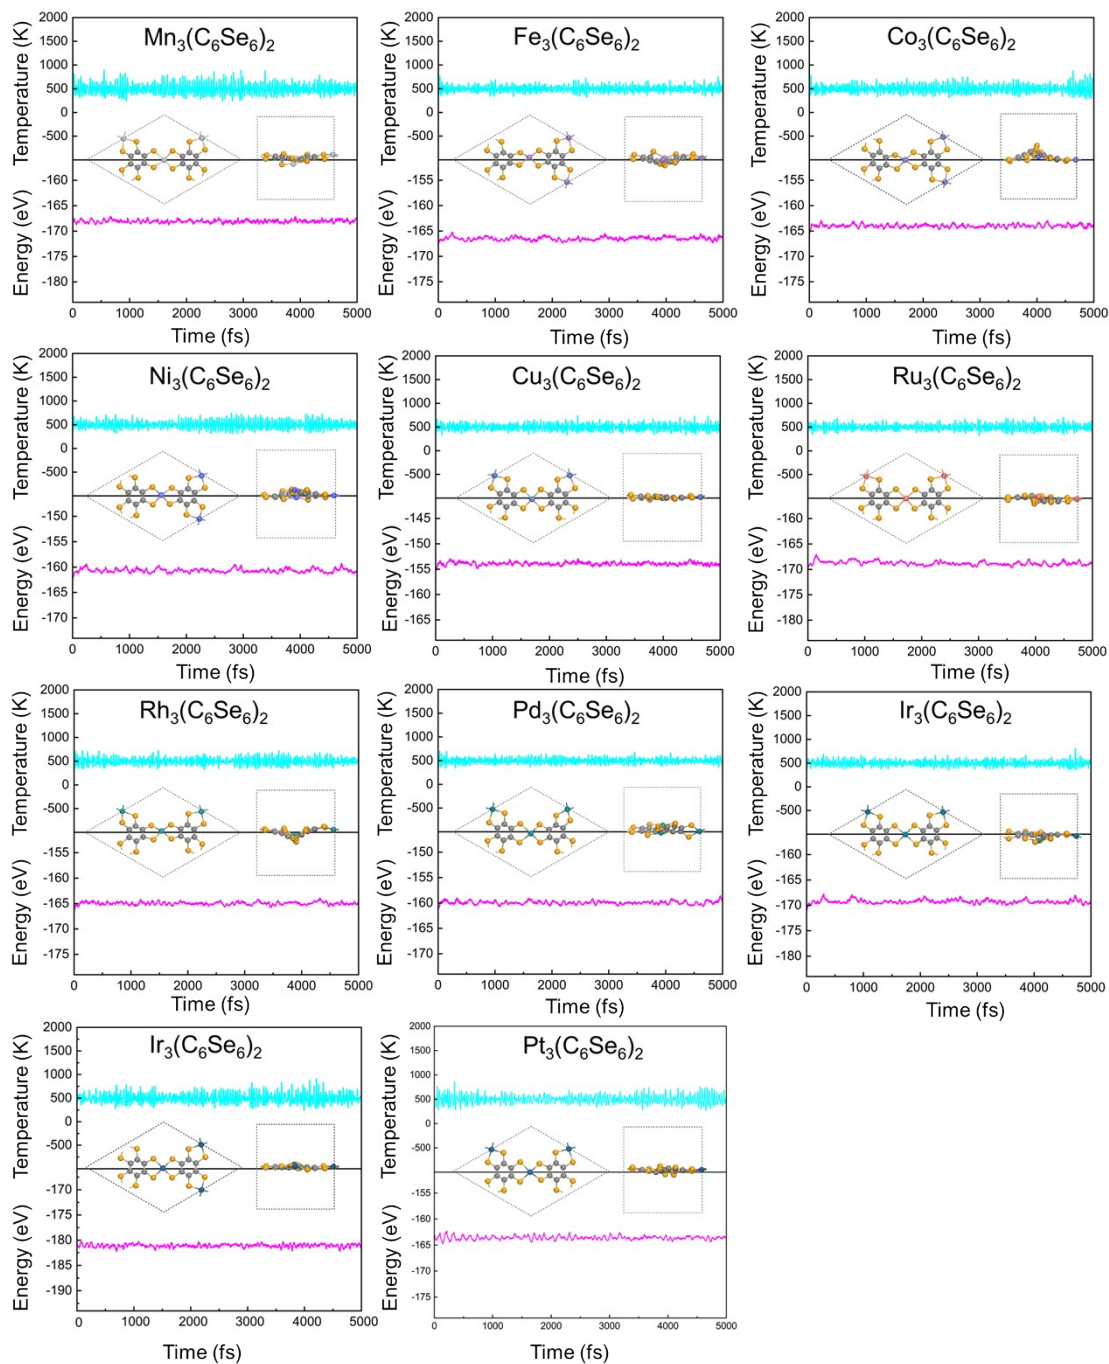

**Figure S1.** Energy and temperature variations of eleven 2D MOFs in AIMD simulations and their structural snapshots (top and side views) at 5ps.

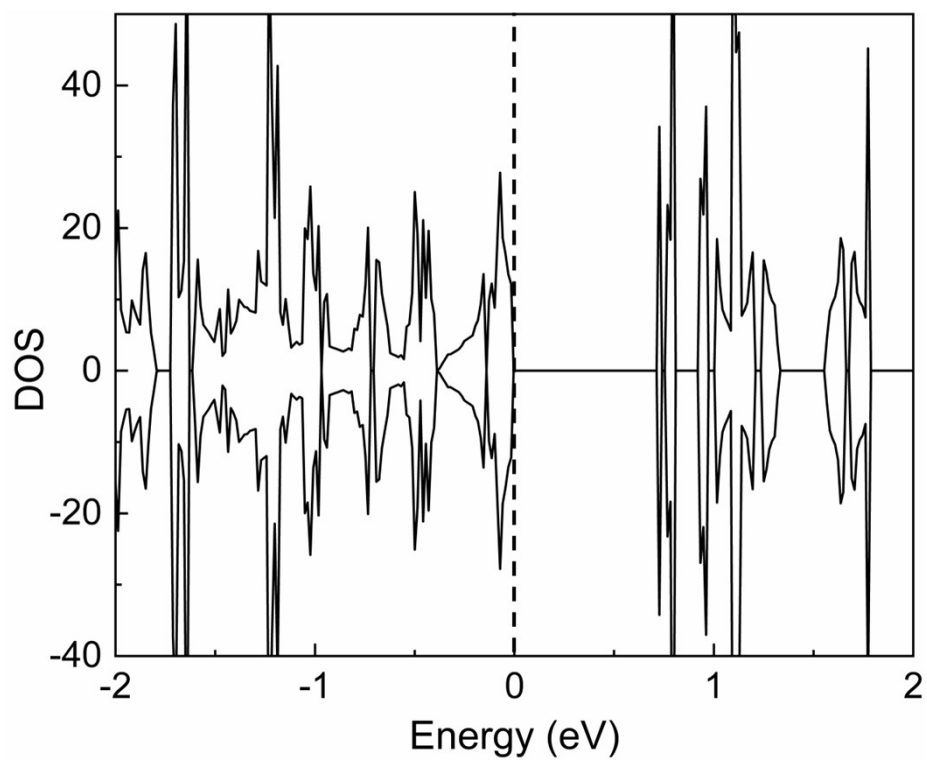

**Figure S2.** The density of states diagram for  $\text{Ti}_3(\text{C}_6\text{Se}_6)_2$ .

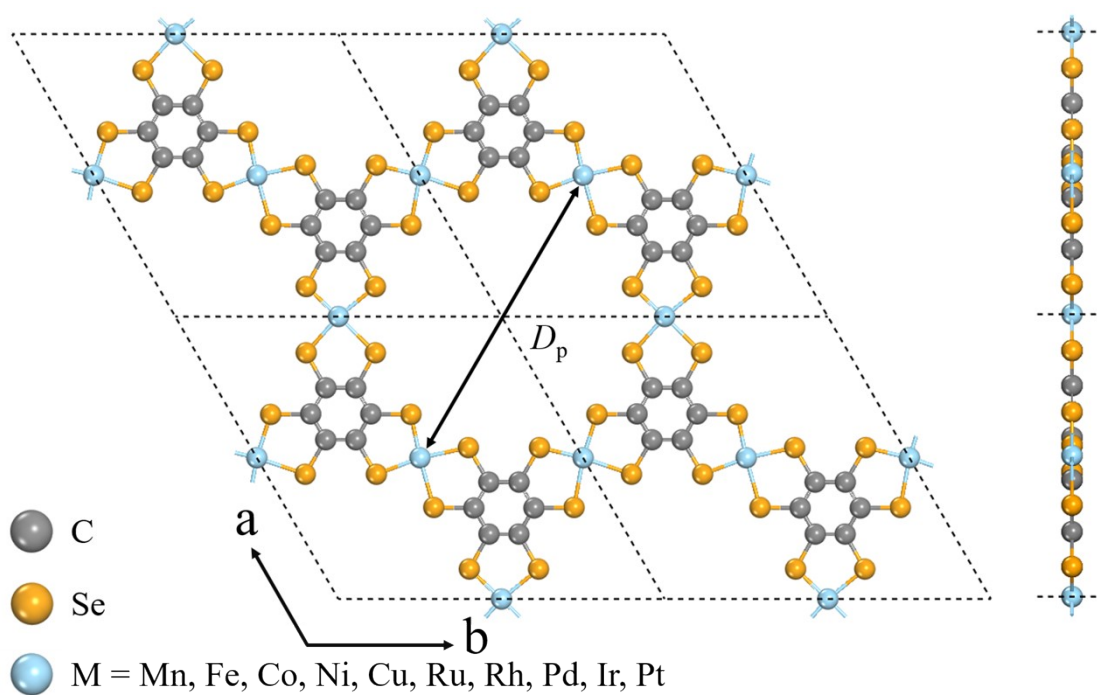

**Figure S3.** Top and side view of  $\text{M}_3(\text{C}_6\text{Se}_6)_2$ .

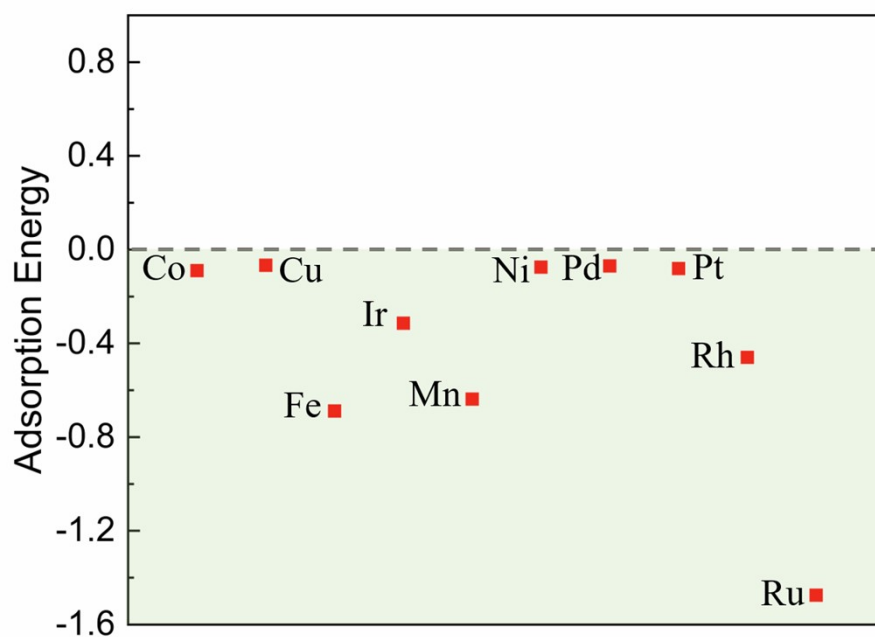

**Figure S4.** O<sub>2</sub> adsorption energy on 2D M<sub>3</sub>(C<sub>6</sub>Se<sub>6</sub>)<sub>2</sub>.

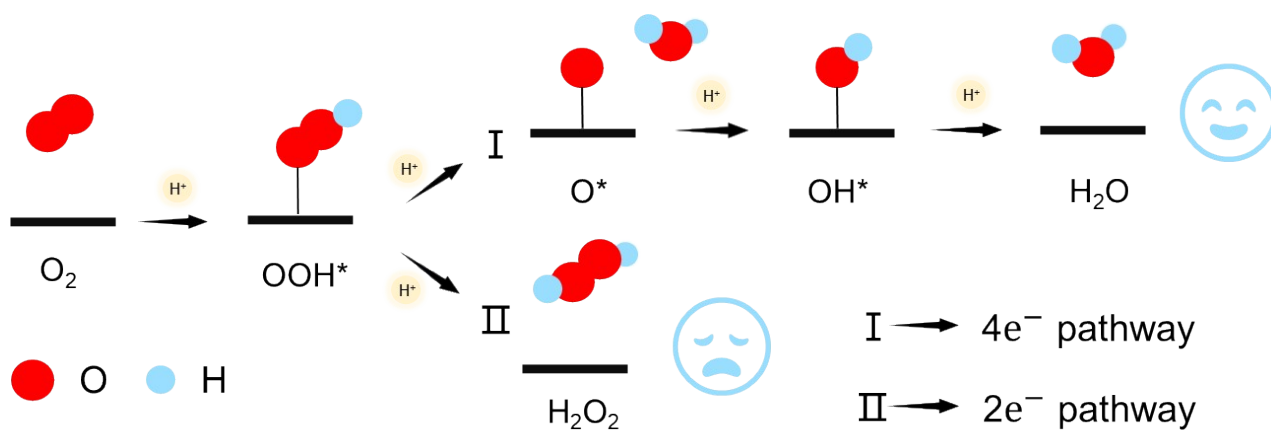

**Fig S5.** Schematic diagram of the reaction pathway for O<sub>2</sub> reduction.

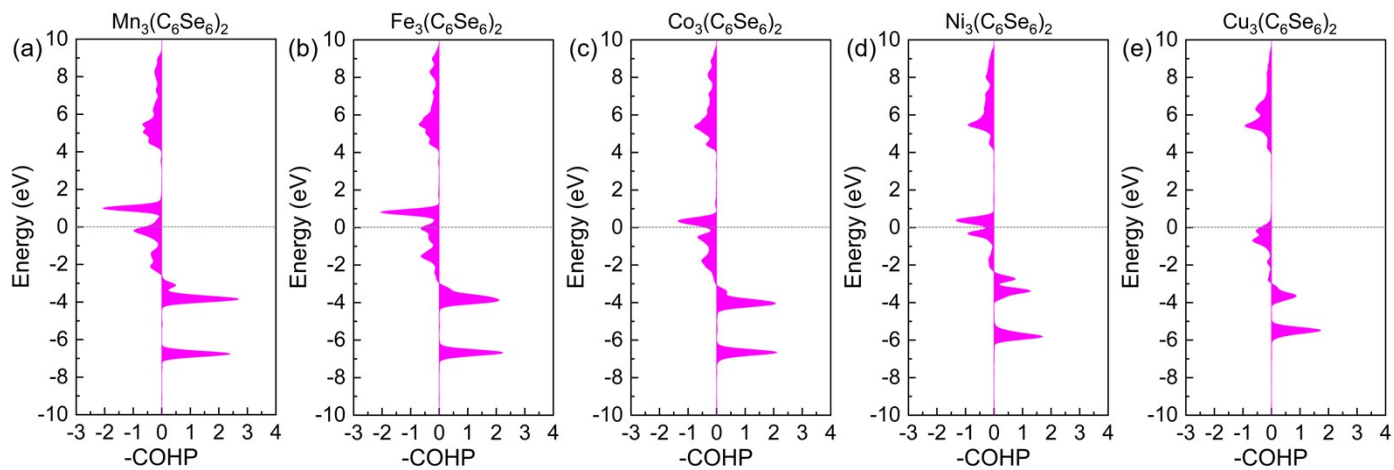

**Figure S6.** (a)-(e) pCOHP between 4d TM centers (from Mn to Cu) and OH intermediate. The right and left sides represent the bonding and antibonding contributions, respectively.
